# Supplementary material
Source: PubMed Central journal article supplement (PMC4156774)
Supplement: 1406156111_pnas.1406156111.sapp.pdf [file 1406156111_pnas.1406156111.sapp.pdf]

## SI Appendix

### **Xylan utilization in human gut commensal bacteria is orchestrated by unique modular organization of polysaccharide degrading enzymes**

Meiling Zhang<sup>1,2,3</sup>, Jonathan R. Chekan<sup>4</sup>, Dylan Dodd<sup>1,2,5</sup>, Pei-Ying Hong<sup>3</sup>, Lauren Radlinski<sup>1,2,5</sup>, Vanessa Revindran<sup>1,2</sup>, Satish K. Nair<sup>2,4\*</sup>, Roderick I. Mackie<sup>1,2,3\*</sup>, and Isaac Cann<sup>1,2,3,5\*</sup>

Energy Biosciences Institute<sup>1</sup>, Institute for Genomic Biology<sup>2</sup>, Department of Animal Sciences<sup>3</sup>, Department of Biochemistry<sup>4</sup>, Department of Microbiology<sup>5</sup>, University of Illinois at Urbana-Champaign, Urbana, IL 61801, USA

## **SI Materials and Methods**

**Circular dichroism (CD) spectroscopy.** The circular dichroism spectra for the wild type and mutant proteins were recorded to evaluate their secondary structures. The CD analyses were carried out using a J-815 CD spectropolarimeter (Jasco, Japan) equipped with a constant temperature cell holder. The proteins were equilibrated in a 1 mm path-length quartz cuvette at 25 °C for 5 min before scanning. The initial wavelength of the measurement was 260 nm and the final wavelength was 190 nm with a wavelength step of 0.1 nm. Secondary structure analysis was performed on the DichroWeb (<http://dichroweb.cryst.bbk.ac.uk/html/home.shtml>) using an algorithm of CDSSTR with reference set 4.

## **SI Results**

**Circular dichroism spectra of Bixyn10A, CBM1, CBM2 and their mutants.** The CD spectra of BiXyn10A, CBM1, CBM2 and their mutants were assessed to determine whether mutations introduced into their wild-type form led to gross changes in secondary structural elements. For the mutations that impacted the binding activity of CBM1 (i.e., W176A and W249A), neither yielded  $\alpha$ -helix and  $\beta$ -turn compositions which were different compared to the wild-type protein (Table S8). In the case of CBM2, W363A abolished binding without impacting the secondary structural elements compared to the wild-type protein (Table S9). Importantly, when W176A, W249A and W363A were introduced into BiXyn10A as individual mutations or to create a triple mutant, the secondary structural elements of the mutants were not statistically different from the wild-type protein. A similar observation (no statistical significant changes in secondary structural elements) was made for BiXyn10A-E634A, the mutant made to abolish catalytic activity (Table S10).

## SI Tables

**Table S1.** Anaerobic medium for culturing *Bacteroides intestinalis* DSM 17393 and *Bacteroides ovatus* ATCC 8483

| Ingredients                                                                                                                                                                                                                                                                                                                                                                                                                                                                                                                                                                          | Concentration in Media<br>(mg/L) |
|--------------------------------------------------------------------------------------------------------------------------------------------------------------------------------------------------------------------------------------------------------------------------------------------------------------------------------------------------------------------------------------------------------------------------------------------------------------------------------------------------------------------------------------------------------------------------------------|----------------------------------|
| Xylose <sup>a</sup>                                                                                                                                                                                                                                                                                                                                                                                                                                                                                                                                                                  | 5000                             |
| Wheat arabinoxylan (medium viscosity, 22 cSt) <sup>a</sup>                                                                                                                                                                                                                                                                                                                                                                                                                                                                                                                           | 5000                             |
| Clarified rumen fluid                                                                                                                                                                                                                                                                                                                                                                                                                                                                                                                                                                | 200 mL                           |
| Yeast extract                                                                                                                                                                                                                                                                                                                                                                                                                                                                                                                                                                        | 500                              |
| Tryptone                                                                                                                                                                                                                                                                                                                                                                                                                                                                                                                                                                             | 1000                             |
| Resazurin (0.1% w/v)                                                                                                                                                                                                                                                                                                                                                                                                                                                                                                                                                                 | 1.0 mL                           |
| Cysteine-HCl (2.5%, w/v)                                                                                                                                                                                                                                                                                                                                                                                                                                                                                                                                                             | 10 mL                            |
| Hemin (0.1% w/v)                                                                                                                                                                                                                                                                                                                                                                                                                                                                                                                                                                     | 1.0 mL                           |
| Sodium sulfide (2.5%, w/v)                                                                                                                                                                                                                                                                                                                                                                                                                                                                                                                                                           | 5.0 mL                           |
| Sodium carbonate (8%, w/v)                                                                                                                                                                                                                                                                                                                                                                                                                                                                                                                                                           | 30 mL                            |
| Mineral solution 1 (mL/L)<br>KH <sub>2</sub> PO <sub>4</sub> (6 g/L)                                                                                                                                                                                                                                                                                                                                                                                                                                                                                                                 | 75 mL                            |
| Mineral solution 2 (mL/L)<br>KH <sub>2</sub> PO <sub>4</sub> (6 g/L)<br>(NH <sub>4</sub> ) <sub>2</sub> SO <sub>4</sub> (12 g/L)<br>NaCl (12 g/L)<br>MgSO <sub>4</sub> ·7H <sub>2</sub> O (1.2 g/L)<br>CaCl <sub>2</sub> ·2H <sub>2</sub> O (1.2 g/L)                                                                                                                                                                                                                                                                                                                                | 75 mL                            |
| Trace element solution (mL/L) <sup>b</sup><br>Nitrilotriacetic acid (1.5 g/L)<br>MgSO <sub>4</sub> ·7H <sub>2</sub> O (3 g/L)<br>MnSO <sub>4</sub> ·2H <sub>2</sub> O (0.5 g/L)<br>NaCl (1 g/L)<br>FeSO <sub>4</sub> ·7H <sub>2</sub> O (0.1 g/L)<br>CoCl <sub>2</sub> (0.1 g/L)<br>CaCl <sub>2</sub> ·2H <sub>2</sub> O (0.1 g/L)<br>ZnSO <sub>4</sub> (0.1 g/L)<br>CuSO <sub>4</sub> ·5H <sub>2</sub> O (0.01 g/L)<br>AlK(SO <sub>4</sub> ) <sub>2</sub> (0.01 g/L)<br>H <sub>3</sub> BO <sub>3</sub> (0.01 g/L)<br>Na <sub>2</sub> MoO <sub>4</sub> ·2H <sub>2</sub> O (0.01 g/L) | 10 mL                            |
| Vitamin solution (mL/L)<br>Thiamine-HCl (200 mg/L)<br>Riboflavin (200 mg/L)<br>Pyridoxine-HCl (200 mg/L)<br><i>Para</i> -aminobenzoic acid (10 mg/L)<br>Biotin (2.5 mg/L)<br>Folic acid (2.5 mg/L)<br>Calcium pantothenate (200 mg/L)<br>Nicotinamide (200 mg/L)<br>Vitamin B <sub>12</sub> (1 mg/L)                                                                                                                                                                                                                                                                                 | 5.0 mL                           |
| VFA solution (mL/L)<br>Acetic acid (16.8% v/v)<br>Propionic acid (6.68% v/v)<br><i>n</i> -butyric acid (3.96% v/v)<br>Isobutyric acid (0.8% v/v)<br><i>n</i> -valeric acid (0.92% v/v)<br>Isovaleric acid (0.92% v/v)<br>D,L-2-methylbutyric acid (0.8% v/v)                                                                                                                                                                                                                                                                                                                         | 10 mL                            |

<sup>a</sup> Either xylose or soluble wheat arabinoxylan were used as the sole carbohydrate source.

<sup>b</sup> Trace element solution was prepared as described by Balch *et al.* (1). Nitrilotriacetic acid was first dissolved by adjusting the pH to 6.5 with KOH. Next, the remaining trace elements were added, the pH was adjusted to 7.0 with KOH, and then the volume was brought to 1 L with milliQ H<sub>2</sub>O.

1. Balch WE, Fox GE, Magrum LJ, Woese CR, & Wolfe RS (1979) Methanogens: reevaluation of a unique biological group. *Microbiol Rev* 43(2):260-296.

**Table S2.** RNAseq mapping results

| RNAseq Sample ID | Total reads<br>(avg. length) | Reads after<br>Trimming <sup>a</sup><br>(avg. length) | Uniquely<br>mapped reads <sup>b</sup><br>(%) | Non-specifically<br>mapped reads<br>(%) | Unmapped<br>reads<br>(%) |
|------------------|------------------------------|-------------------------------------------------------|----------------------------------------------|-----------------------------------------|--------------------------|
| BACINT_WAX1      | 10,101,023<br>(100 nt)       | 10,100,976<br>(94.7 nt)                               | 8,597,177<br>(85.1%)                         | 8,786<br>(0.09%)                        | 1,495,013<br>(14.8%)     |
| BACINT_WAX2      | 22,325,130<br>(100 nt)       | 22,325,047<br>(94.8 nt)                               | 18,839,356<br>(84.4%)                        | 20,881<br>(0.09%)                       | 3,464,810<br>(15.5%)     |
| BACINT_Xylose1   | 17,076,556<br>(100 nt)       | 17,076,484<br>(94.7 nt)                               | 14,281,134<br>(83.6%)                        | 14,737<br>(0.09%)                       | 2,780,613<br>(16.3%)     |
| BACINT_Xylose2   | 11,009,018<br>(100 nt)       | 11,008,962<br>(94.9 nt)                               | 9,142,140<br>(83.0%)                         | 9,677<br>(0.09%)                        | 1,857,145<br>(16.9%)     |
| BACOVA_WAX1      | 21,824,448<br>(100 nt)       | 21,824,352<br>(95.1 nt)                               | 16,738,339<br>(76.7%)                        | 125,379<br>(0.6%)                       | 4,960,634<br>(22.7%)     |
| BACOVA_WAX2      | 27,234,520<br>(100 nt)       | 27,234,391<br>(95.3 nt)                               | 20,244,307<br>(74.3%)                        | 105,564<br>(0.4%)                       | 6,884,520<br>(25.3%)     |
| BACOVA_Xylose1   | 11,265,889<br>(100 nt)       | 11,265,845<br>(95.1 nt)                               | 9,240,294<br>(82.0%)                         | 58,302<br>(0.5%)                        | 2,025,551<br>(18.0%)     |
| BACOVA_Xylose2   | 15,992,242<br>(100 nt)       | 15,992,175<br>(95.0 nt)                               | 12,609,816<br>(78.8%)                        | 60,094<br>(0.4%)                        | 3,322,265<br>(20.8%)     |

<sup>a</sup> Reads were trimmed using CLC Genomics Workbench v5.0 with a quality score limit of 0.05 and maximum number of ambiguities of 2.

<sup>b</sup> Reads were mapped to the *B. intestinalis* DSM 17393 or *B. ovatus* ATCC 8483 genome using CLC Genomics Workbench v5.0 with a minimum length fraction of 0.9, a minimum similarity fraction of 0.8, and maximum number of hits for a read of 10.

**Table S3.** Primers used in this study.

| Gene name                      | Primer name | Orientation | Sequence (5' → 3')                                                     |
|--------------------------------|-------------|-------------|------------------------------------------------------------------------|
| <b>Cloning<sup>a</sup></b>     |             |             |                                                                        |
| BACINT_04215                   | P1          | Forward     | <u>GACGACGACAAGATGGTGGACGACAAACCGTTGGCATT</u> CGAAG                    |
| BACINT_04215                   | P2          | Forward     | <u>GACGACGACAAGATGAATAACAAGTTTTGAATTCGTTGATT</u>                       |
| BACINT_04215                   | P3          | Reverse     | <u>GAGGAGAAGCCCCGGTTAAGCCTCAGAATGAGTAATCTTAACATA</u>                   |
| BACINT_04215                   | P4          | Forward     | <u>GACGACGACAAGATGGCTCCGGTTATGGAAATCTTTACCGAC</u>                      |
| BACINT_04215                   | P5          | Reverse     | <u>GAGGAGAAGCCCCGGTTAGAGAGGAATAGAATTGCCCTTAGTTAC</u>                   |
| BACINT_04215                   | P6          | Reverse     | <u>GAGGAGAAGCCCCGGTTATTTCCAGCCAATCCATCAGC</u>                          |
| BACINT_02810                   | P1          | Forward     | <u>GACGACGACAAGATGGCTTCGGGAGGGCGACAATATTTTC</u>                        |
| BACINT_02810                   | P2          | Reverse     | <u>GAGGAGAAGCCCCGGTTAGTAAGCATGCCACTC</u>                               |
| BACOVA_00247                   | P1          | Forward     | <u>GACGACGACAAGATGAATAATGGGACATTAGTG</u>                               |
| BACOVA_00247                   | P2          | Reverse     | <u>GAGGAGAAGCCCCGGTTACTTAGTTGCAGCAAC</u>                               |
| BACINT_04197                   | P1          | Forward     | <u>GACGACGACAAGATGCAGCAGAAACAAATGTAC</u>                               |
| BACINT_04197                   | P2          | Reverse     | <u>GAGGAGAAGCCCCGGTTAGTCGGCAAACGAAG</u>                                |
| PBR_0377                       | P1          | Forward     | <u>GACGACGACAAGATGTCTCAGCAGCAAGTAGC</u>                                |
| PBR_0377                       | P2          | Reverse     | <u>GAGGAGAAGCCCCGGTTACTTTACTTCTTCGGTC</u>                              |
| BACOVA_04390                   | P1          | Forward     | <u>GACGACGACAAGATGACTAATCAGAATGCGAG</u>                                |
| BACOVA_04390                   | P2          | Reverse     | <u>GAGGAGAAGCCCCGGTTAAAAATCTCCGTTAGAAATC</u>                           |
| BACEGG_01298                   | P1          | Forward     | <u>GACGACGACAAGATGGTAGGCAAACATACATGGTG</u>                             |
| BACEGG_01298                   | P2          | Reverse     | <u>GAGGAGAAGCCCCGGTTAGCAGGCTTCCATC</u>                                 |
| PRU_2739                       | P1          | Forward     | <u>GACGACGACAAGATGAGCTATGACGGTACTCTTG</u>                              |
| PRU_2739                       | P2          | Reverse     | <u>GAGGAGAAGCCCCGGTTACTCTGTACAGAGGCAG</u>                              |
| <b>Mutagenesis<sup>b</sup></b> |             |             |                                                                        |
| BACINT_04215                   | Y173A       | Forward     | GAAATAGACTATTCTACTGCGGG <u>CGCT</u> AGTTTTTGGAAACGAAGTAAA<br>TGAA      |
| BACINT_04215                   | F175A       | Forward     | GACTATTCTACTGCGGGCTATAGT <u>GCTT</u> GGAACGAAGTAAATGAAGA<br>AG         |
| BACINT_04215                   | W176A       | Forward     | CTATTCTACTGCGGGCTATAGTTTT <u>GCGA</u> ACGAAGTAAATGAAGAAG               |
| BACINT_04215                   | W249A       | Forward     | GAATTTTGGTGTAGGACCT <u>GCG</u> AGTGGTAGAGCAGAAGGT                      |
| BACINT_04215                   | W263A       | Forward     | AAGGTTCTTTTTCTTTCAACACAGAAG <u>GCG</u> AAAAGAGTATGAGTTTTTCAT<br>TCAAAG |
| BACINT_04215                   | W363A       | Forward     | CAGCAGGTGGTGGTGTAATAGT <u>GCG</u> GATACTCAGTTCTT                       |
| BACINT_04215                   | W421A       | Forward     | GGATGTGCTGTTGATTTTACTACAGAAG <u>GCG</u> CAACATTTTGAAAAAAC<br>TATAAC    |
| BACINT_04215                   | W445A       | Forward     | GAAAAATGCAGACTTTTGCAG <u>GCG</u> AATCTTGATGTAGGTGTGCC                  |
| BACINT_04215                   | E654A       | Forward     | TGGTAAACTGGTAAAGATATCAG <u>CACT</u> TGATATGGGTTATATAGATG               |

<sup>a</sup> Underlined sequences indicate the incorporated T4 exonuclease digestion sites. Italicized nucleotides indicate translational stop codons inserted at the end of the construct. The primer names correspond to those mentioned in the text and shown in Figure S1.

<sup>b</sup> Primers were designed using the Agilent Technologies QuikChange primer design tool. Underlined sequences indicate the substituted codon.

**Table S4.** Genes up-regulated greater than five-fold during growth of *B. intestinalis* DSM 17393 with WAX compared to xylose assessed by RNAseq and listed by magnitude of induction.<sup>a</sup>

| ORF          | Annotation <sup>b</sup>           | Fold change | CAZy Designation |
|--------------|-----------------------------------|-------------|------------------|
| BACINT_04218 | SusC-like                         | 214         | -                |
| BACINT_04220 | SusC-like                         | 182         | -                |
| BACINT_04215 | endo-xylanase                     | 170         | GH10/CBM         |
| BACINT_04216 | hypothetical protein              | 167         | -                |
| BACINT_04219 | SusD-like                         | 142         | -                |
| BACINT_00570 | beta-xylosidase                   | 135         | GH43             |
| BACINT_00569 | arabinofuranosidase/endo-xylanase | 132         | GH43/GH10        |
| BACINT_04217 | SusD-like                         | 98.1        | -                |
| BACINT_04201 | Na/sodium co-transporter          | 97.0        | -                |
| BACINT_04202 | endo-xylanase/arabinofuranosidase | 90.0        | GH10/GH43        |
| BACINT_04199 | beta-galactosidase                | 87.5        | GH35             |
| BACINT_04200 | esterase                          | 85.1        | GH2/CE6          |
| BACINT_04198 | hypothetical protein              | 78.4        | -                |
| BACINT_04203 | beta-xylosidase                   | 71.0        | GH43             |
| BACINT_04213 | endo-xylanase                     | 70.1        | GH5              |
| BACINT_04204 | oxidoreductase                    | 65.6        | -                |
| BACINT_04205 | alpha-glucuronidase               | 62.5        | GH67             |
| BACINT_04214 | hypothetical protein              | 60.7        | -                |
| BACINT_04196 | hypothetical protein              | 41.9        | -                |
| BACINT_01180 | hypothetical protein              | 41.7        | -                |
| BACINT_01179 | hypothetical protein              | 41.4        | -                |
| BACINT_04197 | endo-xylanase                     | 39.2        | GH10/CBM         |
| BACINT_04195 | SusD-like                         | 36.4        | -                |
| BACINT_02768 | beta-xylosidase                   | 34.2        | GH43             |
| BACINT_04194 | SusC-like                         | 32.1        | -                |
| BACINT_00076 | xylanase-esterase                 | 28.8        | GH10/CE1         |
| BACINT_02774 | SusC-like                         | 28.2        | -                |
| BACINT_02773 | SusD-like                         | 26.3        | -                |
| BACINT_02772 | SusC-like                         | 25.8        | -                |
| BACINT_02776 | hypothetical protein              | 25.2        | -                |
| BACINT_01178 | hypothetical protein              | 23.7        | -                |
| BACINT_02767 | arabinofuranosidase               | 22.9        | CBM4/GH51        |
| BACINT_02775 | SusD-like                         | 22.5        | -                |
| BACINT_02771 | hypothetical protein              | 21.8        | -                |
| BACINT_00908 | SusC-like                         | 21.4        | -                |
| BACINT_00927 | exo-xylanase                      | 19.7        | GH8              |
| BACINT_02777 | beta-xylosidase                   | 19.7        | GH43             |
| BACINT_00926 | beta-xylosidase                   | 19.2        | GH3              |
| BACINT_02766 | beta-xylosidase                   | 19.1        | GH43             |
| BACINT_00907 | SusD-like                         | 18.7        | -                |
| BACINT_01181 | hypothetical protein              | 17.5        | -                |
| BACINT_02782 | L-arabinose isomerase             | 17.5        | -                |
| BACINT_04210 | exo-xylanase                      | 17.2        | GH8              |
| BACINT_04212 | esterase                          | 16.8        | CE1              |
| BACINT_02783 | xylulose kinase                   | 15.3        | -                |
| BACINT_04706 | hypothetical protein              | 15.1        | -                |
| BACINT_01183 | hypothetical protein              | 14.4        | -                |

|              |                                    |      |           |
|--------------|------------------------------------|------|-----------|
| BACINT_02784 | hypothetical protein               | 14.4 | -         |
| BACINT_04211 | alpha-rhamnosidase                 | 14.3 | CE6/GH95  |
| BACINT_02786 | arabinofuranosidase                | 14.3 | GH51      |
| BACINT_02781 | L-ribulose-5-phosphate 4-epimerase | 14.2 | -         |
| BACINT_02785 | alpha-glucosidase                  | 13.8 | GH97      |
| BACINT_01095 | beta-xylosidase                    | 13.5 | GH43/CBM6 |
| BACINT_01182 | hypothetical protein               | 13.4 | -         |
| BACINT_01094 | esterase                           | 13.1 | CE1       |
| BACINT_01184 | hypothetical protein               | 12.8 | -         |
| BACINT_02779 | Na/sodium cotransporter            | 10.8 | -         |
| BACINT_04223 | hypothetical protein               | 10.7 | GH115     |
| BACINT_02780 | ADP-ribose pyrophosphorylase       | 10.7 | -         |
| BACINT_02778 | aldose 1-epimerase                 | 9.92 | -         |
| BACINT_00772 | hypothetical protein               | 9.14 | -         |
| BACINT_04222 | esterase                           | 7.91 | GH2/CE6   |
| BACINT_01185 | hypothetical protein               | 7.47 | -         |
| BACINT_03137 | hypothetical protein               | 7.16 | -         |
| BACINT_01190 | hypothetical protein               | 6.78 | -         |
| BACINT_01096 | hypothetical protein               | 6.17 | -         |
| BACINT_01186 | hypothetical protein               | 5.89 | -         |

<sup>a</sup> *B. intestinalis* DSM 17393 was cultured in a synthetic medium with either soluble wheat arabinoxylan (WAX) or xylose as the sole carbohydrate source. RNA was then extracted and RNAseq experiments were performed as described in experimental procedures.

<sup>b</sup> Open reading frame assignments and gene annotations were from the Joint Genome Institute's Integrated Microbial Genomes database (<http://img.jgi.doe.gov/cgi-bin/w/main.cgi>).



**Table S5.** Genes up-regulated greater than five-fold during growth of *B. ovatus* ATCC 8483 with WAX compared to xylose assessed by RNAseq and listed by magnitude of induction.<sup>a</sup>

| ORF          | Annotation <sup>b</sup>            | Fold change | CAZy Designation |
|--------------|------------------------------------|-------------|------------------|
| BACOVA_04393 | SusC-like                          | 341         | -                |
| BACOVA_04390 | endo-xylanase                      | 335         | GH10/CBM         |
| BACOVA_04389 | Esterase                           | 319         | GH2/CE6          |
| BACOVA_04384 | hypothetical protein               | 312         | -                |
| BACOVA_03427 | SusD-like                          | 300         | -                |
| BACOVA_03422 | alpha-glucosidase                  | 294         | GH31             |
| BACOVA_03425 | beta-xylosidase                    | 286         | GH43             |
| BACOVA_04386 | beta-xylosidase                    | 286         | GH43             |
| BACOVA_04385 | alpha-glucuronidase                | 256         | GH67             |
| BACOVA_04387 | endo-xylanase                      | 244         | GH10             |
| BACOVA_03426 | SusC-like                          | 241         | GH35             |
| BACOVA_03423 | alpha-glucosidase                  | 234         | GH97             |
| BACOVA_03428 | SusC-like                          | 217         | -                |
| BACOVA_03424 | beta-xylosidase                    | 201         | GH43/CBM6        |
| BACOVA_03431 | hypothetical protein               | 201         | -                |
| BACOVA_04391 | hypothetical protein               | 194         | -                |
| BACOVA_03433 | endo-beta-galactosidase            | 171         | GH98/CBM35       |
| BACOVA_03429 | SusD-like                          | 166         | -                |
| BACOVA_03432 | endo-xylanase                      | 164         | GH30             |
| BACOVA_03421 | beta-xylosidase                    | 163         | GH43             |
| BACOVA_03417 | beta-xylosidase                    | 158         | GH43             |
| BACOVA_04392 | SusD-like                          | 145         | -                |
| BACOVA_04388 | Na/sugar cotransporter             | 112         | -                |
| BACOVA_03434 | alpha-glucuronidase                | 105         | GH115            |
| BACOVA_03436 | beta-xylosidase                    | 94.0        | GH43/CBM6        |
| BACOVA_01707 | hypothetical protein               | 71.2        | -                |
| BACOVA_03430 | hypothetical protein               | 58.6        | -                |
| BACOVA_03435 | Esterase                           | 49.2        | CE6/CE1          |
| BACOVA_03449 | alpha-glucuronidase                | 43.6        | GH115            |
| BACOVA_01708 | alpha-arabinofuranosidase          | 42.1        | GH51             |
| BACOVA_03450 | Esterase                           | 41.3        | GH2/CE6          |
| BACOVA_01709 | hypothetical protein               | 36.6        | -                |
| BACOVA_01715 | aldose 1-epimerase                 | 29.6        | -                |
| BACOVA_01714 | Na/sugar cotransporter             | 21.8        | -                |
| BACOVA_01710 | xylulose kinase                    | 20.0        | -                |
| BACOVA_03419 | beta-xylosidase                    | 19.8        | GH3              |
| BACOVA_01713 | ADP-ribose pyrophosphatase         | 19.5        | -                |
| BACOVA_01711 | L-arabinose isomerase              | 19.2        | -                |
| BACOVA_01712 | L-ribulose-5-phosphate 4-epimerase | 16.9        | -                |
| BACOVA_03637 | hypothetical protein               | 15.7        | -                |

|              |                           |      |      |
|--------------|---------------------------|------|------|
| BACOVA_04183 | hypothetical protein      | 11.8 | -    |
| BACOVA_03438 | hypothetical protein      | 10.2 | -    |
| BACOVA_01199 | SusD-like                 | 9.63 | -    |
| BACOVA_03483 | alpha-arabinofuranosidase | 9.00 | GH51 |
| BACOVA_03440 | hypothetical protein      | 8.17 | -    |
| BACOVA_01866 | hypothetical protein      | 8.12 | -    |
| BACOVA_03443 | SusC-like                 | 8.00 | -    |
| BACOVA_03447 | hypothetical protein      | 7.98 | -    |
| BACOVA_03437 | HTCS regulator            | 7.83 | -    |
| BACOVA_01865 | hypothetical protein      | 7.69 | -    |
| BACOVA_03444 | SusD-like                 | 7.59 | -    |
| BACOVA_03446 | hypothetical protein      | 7.38 | -    |
| BACOVA_01864 | hypothetical protein      | 7.06 | -    |
| BACOVA_03445 | hypothetical protein      | 7.03 | -    |
| BACOVA_03439 | hypothetical protein      | 6.87 | -    |
| BACOVA_03484 | alpha-glucosidase         | 6.59 | GH97 |
| BACOVA_01868 | hypothetical protein      | 6.41 | -    |
| BACOVA_01867 | hypothetical protein      | 6.28 | -    |
| BACOVA_01869 | hypothetical protein      | 5.83 | -    |
| BACOVA_04621 | site-specific recombinase | 5.75 | -    |
| BACOVA_04960 | hypothetical protein      | 5.62 | -    |
| BACOVA_01497 | hypothetical protein      | 5.23 | -    |
| BACOVA_05005 | pectate lyase             | 5.02 | PL1  |

<sup>a</sup> *B. ovatus* ATCC 8483 was cultured in a synthetic medium with either soluble wheat arabinoxylan (WAX) or xylose as the sole carbohydrate source. RNA was then extracted and RNAseq experiments were performed as described in experimental procedures.

<sup>b</sup> Open reading frame assignments and gene annotations were from the Joint Genome Institute's Integrated Microbial Genomes database (<http://img.jgi.doe.gov/cgi-bin/w/main.cgi>).

**Table S6.** Kinetic properties of BiXyn10A and mutants with OSX<sup>a</sup>

| Protein           | $k_{\text{cat}}$<br>(s <sup>-1</sup> ) | $K_M$<br>(ml mg <sup>-1</sup> ) | $k_{\text{cat}}/K_M$<br>(ml mg <sup>-1</sup> s <sup>-1</sup> ) |
|-------------------|----------------------------------------|---------------------------------|----------------------------------------------------------------|
| WT                | 54 ± 6                                 | 7.4 ± 2                         | 7.4 ± 2                                                        |
| W176A             | 32 ± 7                                 | 11 ± 5                          | 2.9 ± 1                                                        |
| W249A             | 39 ± 6                                 | 11 ± 4                          | 3.4 ± 1                                                        |
| W363A             | 27 ± 2                                 | 8.8 ± 2                         | 3.1 ± 0.7                                                      |
| W176A/W249A/W363A | 15 ± 1                                 | 6.7 ± 1                         | 2.2 ± 0.4                                                      |

<sup>a</sup> BiXyn10A wild type and mutants were incubated with OSX and initial rates of reducing sugar release were monitored at different substrate concentrations. The rate of reducing sugar release was plotted against the substrate concentration and non-linear regressions were used to estimate the kinetic parameters. Experiments were performed in triplicate and the data are represented as means ± standard deviations.

**Table S7.** Kinetic properties of BiXyn10A and mutants with WAX<sup>a</sup>

| Protein           | $k_{\text{cat}}$<br>(s <sup>-1</sup> ) | $K_M$<br>(ml mg <sup>-1</sup> ) | $k_{\text{cat}}/K_M$<br>(ml mg <sup>-1</sup> s <sup>-1</sup> ) |
|-------------------|----------------------------------------|---------------------------------|----------------------------------------------------------------|
| WT                | 93 ± 6                                 | 1.7 ± 0.4                       | 57 ± 10                                                        |
| W176A             | 70 ± 4                                 | 2.7 ± 0.5                       | 26 ± 5                                                         |
| W249A             | 57 ± 2                                 | 1.5 ± 0.2                       | 37 ± 5                                                         |
| W363A             | 57 ± 3                                 | 2.0 ± 0.3                       | 29 ± 5                                                         |
| W176A/W249A/W363A | 69 ± 3                                 | 2.1 ± 0.3                       | 33 ± 5                                                         |

<sup>a</sup> BiXyn10A wild type and mutants were incubated with WAX and initial rates of reducing sugar release were monitored at different substrate concentrations. The rate of reducing sugar release was plotted against the substrate concentration and non-linear regressions were used to estimate the kinetic parameters. Experiments were performed in triplicate and the data are represented as means ± standard deviations.

**Table S8.** CD spectroscopy analysis of CBM1 and its mutants with abolished substrate binding<sup>a</sup>

| Protein    | $\alpha$ -helices (%) | $\beta$ -strands (%) | $\beta$ -turns (%) | unordered (%) |
|------------|-----------------------|----------------------|--------------------|---------------|
| CBM1       | 1 $\pm$ 1             | 49 $\pm$ 1           | 21 $\pm$ 0         | 26 $\pm$ 0    |
| CBM1 W176A | 2 $\pm$ 1             | 47 $\pm$ 1           | 22 $\pm$ 1         | 26 $\pm$ 1    |
| CBM1 W249A | 3 $\pm$ 1             | 46 $\pm$ 2           | 22 $\pm$ 1         | 27 $\pm$ 3    |

<sup>a</sup> CD spectra were recorded in the far-UV range utilizing a J-815 CD spectropolarimeter. The spectra were recorded from 190 to 260 nm at a scan rate of 50 nm/s and a 1-nm wavelength step with five accumulations. Each reaction was performed three times, and the data are represented as means  $\pm$  standard deviations of the means. The spectra were uploaded onto the DICHROWEB on-line server and analyzed as described in supplemental materials and methods.

**Table S9.** CD spectroscopy analysis of CBM2 and its mutant with abolished substrate binding<sup>a</sup>

| Protein    | $\alpha$ -helices (%) | $\beta$ -strands (%) | $\beta$ -turns (%) | unordered (%) |
|------------|-----------------------|----------------------|--------------------|---------------|
| CBM2       | 2 $\pm$ 1             | 38 $\pm$ 0           | 23 $\pm$ 6         | 34 $\pm$ 0    |
| CBM2 W363A | 2 $\pm$ 1             | 39 $\pm$ 1           | 22 $\pm$ 1         | 35 $\pm$ 1    |

<sup>a</sup> CD spectra were recorded in the far-UV range utilizing a J-815 CD spectropolarimeter. The spectra were recorded from 190 to 260 nm at a scan rate of 50 nm/s and a 1-nm wavelength step with five accumulations. Each reaction was performed three times, and the data are represented as means  $\pm$  standard deviations of the means. The spectra were uploaded onto the DICHROWEB on-line server and analyzed as described in supplemental materials and methods.

**Table S10.** CD spectroscopy analysis of BiXyn10A and its mutants <sup>a</sup>

| Protein           | $\alpha$ -helices (%) | $\beta$ -strands (%) | $\beta$ -turns (%) | unordered (%) |
|-------------------|-----------------------|----------------------|--------------------|---------------|
| WT                | 10 $\pm$ 0            | 37 $\pm$ 1           | 22 $\pm$ 0         | 31 $\pm$ 1    |
| E634A             | 10 $\pm$ 2            | 37 $\pm$ 2           | 22 $\pm$ 1         | 30 $\pm$ 1    |
| W176A             | 10 $\pm$ 2            | 35 $\pm$ 2           | 22 $\pm$ 1         | 30 $\pm$ 0    |
| W249A             | 11 $\pm$ 1            | 35 $\pm$ 1           | 22 $\pm$ 1         | 31 $\pm$ 1    |
| W363A             | 10 $\pm$ 2            | 37 $\pm$ 2           | 22 $\pm$ 1         | 31 $\pm$ 1    |
| W176A/W249A/W363A | 10 $\pm$ 2            | 37 $\pm$ 2           | 22 $\pm$ 0         | 30 $\pm$ 1    |

<sup>a</sup> CD spectra were recorded in the far-UV range utilizing a J-815 CD spectropolarimeter. The spectra were recorded from 190 to 260 nm at a scan rate of 50 nm/s and a 1-nm wavelength step with five accumulations. Each reaction was performed three times, and the data are represented as means  $\pm$  standard deviations of the means. The spectra were uploaded onto the DICHROWEB on-line server and analyzed as described in supplemental materials and methods.

**Table S11.** Crystallographic Statistics for BiXyn10A CBM1 and PbXyn10C CBM

|                                      | BiXyn10A CBM1                    | BiXyn10A CBM1-X6                              | PbXyn10C CBM                   |
|--------------------------------------|----------------------------------|-----------------------------------------------|--------------------------------|
| <b>Cell Dimensions</b>               |                                  |                                               |                                |
| Space group                          | P2 <sub>1</sub> 2 <sub>1</sub> 2 | P2 <sub>1</sub> 2 <sub>1</sub> 2 <sub>1</sub> | P3 <sub>1</sub> 2 <sub>1</sub> |
| a, b, c (Å)                          | 53.7, 90.7, 30.9                 | 36.9, 57.0, 85.3                              | 68.7, 68.7, 111.5              |
| $\alpha$ , $\beta$ , $\gamma$ (°)    | 90.0, 90.0, 90.0                 | 90.0, 90.0, 90.0                              | 90.0, 90.0, 120.0              |
| Resolution                           | 22.79-1.80 (1.83-1.80)           | 57.049-1.144 (1.148-1.144)                    | 15.83-1.68 (1.71-1.68)         |
| Total Reflections                    | 112,403                          | 513,642                                       | 161,095                        |
| Unique reflections                   | 14,401 (695)                     | 65,859 (4,183)                                | 35,308 (1,720)                 |
| R <sub>sym</sub> (%)                 | 9.0 (59.5)                       | 6.4 (74.7)                                    | 5.0 (74.4)                     |
| I/ $\sigma$                          | 21.5 (2.4)                       | 16.2 (2.3)                                    | 26.5 (2.0)                     |
| Completeness (%)                     | 100.0 (100.0)                    | 100.0 (99.8)                                  | 99.9 (99.8)                    |
| Redundancy                           | 7.8 (6.5)                        | 7.8 (6.4)                                     | 4.6 (4.6)                      |
| <b>Phasing</b>                       |                                  |                                               |                                |
| Figure of Merit                      | 0.414                            |                                               | 0.260                          |
| <b>Refinement</b>                    |                                  |                                               |                                |
| Resolution (Å)                       | 22.79-1.801                      | 47.44-1.14                                    | 15.83-1.68                     |
| No. reflections                      | 14,363                           | 62,558                                        | 33,795                         |
| R <sub>work</sub> /R <sub>free</sub> | 0.159/0.186                      | 0.160/0.178                                   | 0.186/0.208                    |
| <b>No. of atoms</b>                  |                                  |                                               |                                |
| Protein                              | 1125                             | 1127                                          | 1268                           |
| Water                                | 190                              | 311                                           | 418                            |
| <b>B-factors</b>                     |                                  |                                               |                                |
| Protein                              | 16.52                            | 13.64                                         | 14.51                          |
| Oligosaccharide                      |                                  | 21.74                                         |                                |
| Water                                | 29.14                            | 33.56                                         | 30.31                          |
| <b>Ramachandran analysis</b>         |                                  |                                               |                                |
| Favored                              | 98.58                            | 97.9                                          | 98.09                          |
| Allowed                              | 1.42                             | 2.1                                           | 1.91                           |
| Outliers                             | 0.0                              | 0.0                                           | 0.0                            |
| <b>RMSD</b>                          |                                  |                                               |                                |
| Bond lengths (Å)                     | 0.006                            | 0.0313                                        | 0.006                          |
| Bond angles (°)                      | 1.024                            | 2.362                                         | 1.168                          |
| PDB Code                             | 4MGS                             | 4QPW                                          | 4MGQ                           |



## SI Figures

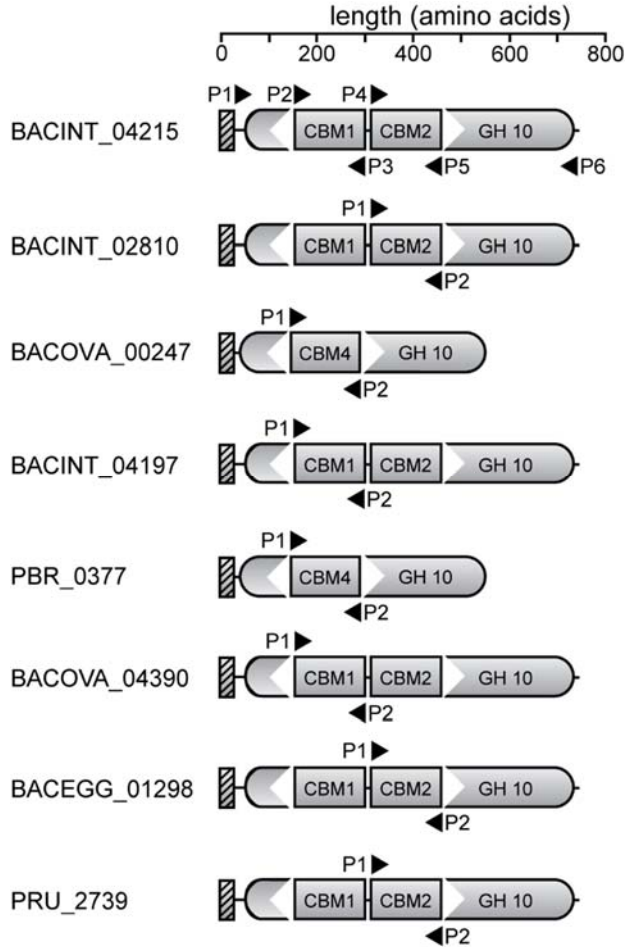

**Figure S1.** Primers used to amplify designated truncational mutants in this study. The nucleotide sequences for the individual primers are provided in Table S3. The BACINT\_04215 truncational mutants, the primers used, and the amino acid regions constructed are as follows: WT (P1-P6, 33-746); TM1 (P2-P5, 138-477); TM2 (P2-P3, 138-301); TM3 (P4-P5, 302-477). The amino acid regions amplified for the remaining genes are as follows: BACINT\_02810 CBM 2 (305-484); BACOVA\_00247 CBM, 123-358; BACINT\_04197 CBM1, 140-329; PBR\_0377 CBM, 133-306; BACOVA\_04390 CBM1, 138-330; BACEGG\_01298 CBM2, 265-471; PRU\_2739 CBM2, 278-442.

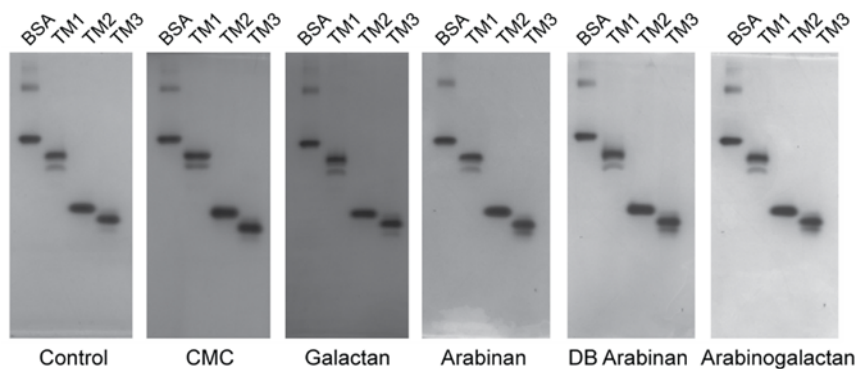

**Figure S2. Affinity Gel Electrophoresis.** Native polyacrylamide gels were prepared with or without 0.1% w/v polysaccharide, and 2  $\mu\text{g}$  of each truncational mutant or 1  $\mu\text{g}$  of bovine serum albumin (BSA) was loaded and electrophoresed at 100 V for 6 h at 4  $^{\circ}\text{C}$ . The proteins were then visualized by staining with Coomassie Brilliant Blue G-250. Polysaccharides used were carboxymethyl cellulose (CMC), potato galactan, sugar beet arabinan, debranched (DB) arabinan, and larch arabinogalactan.

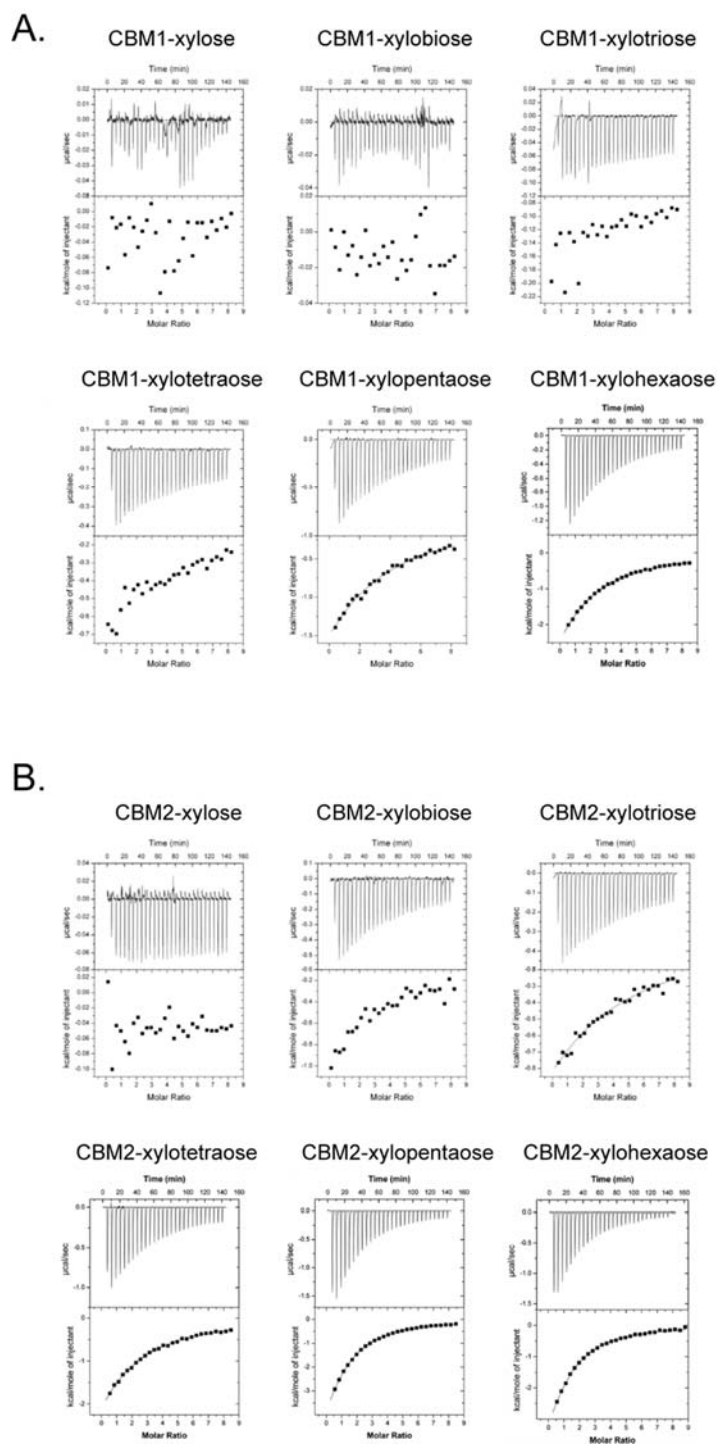

**Figure S3.** Representative ITC data for binding of (A) CBM1 and (B) CBM2 with xylo-oligosaccharides as the ligand. All experiments were carried out in 50 mM sodium phosphate buffer, pH 7.0 at 25 °C.

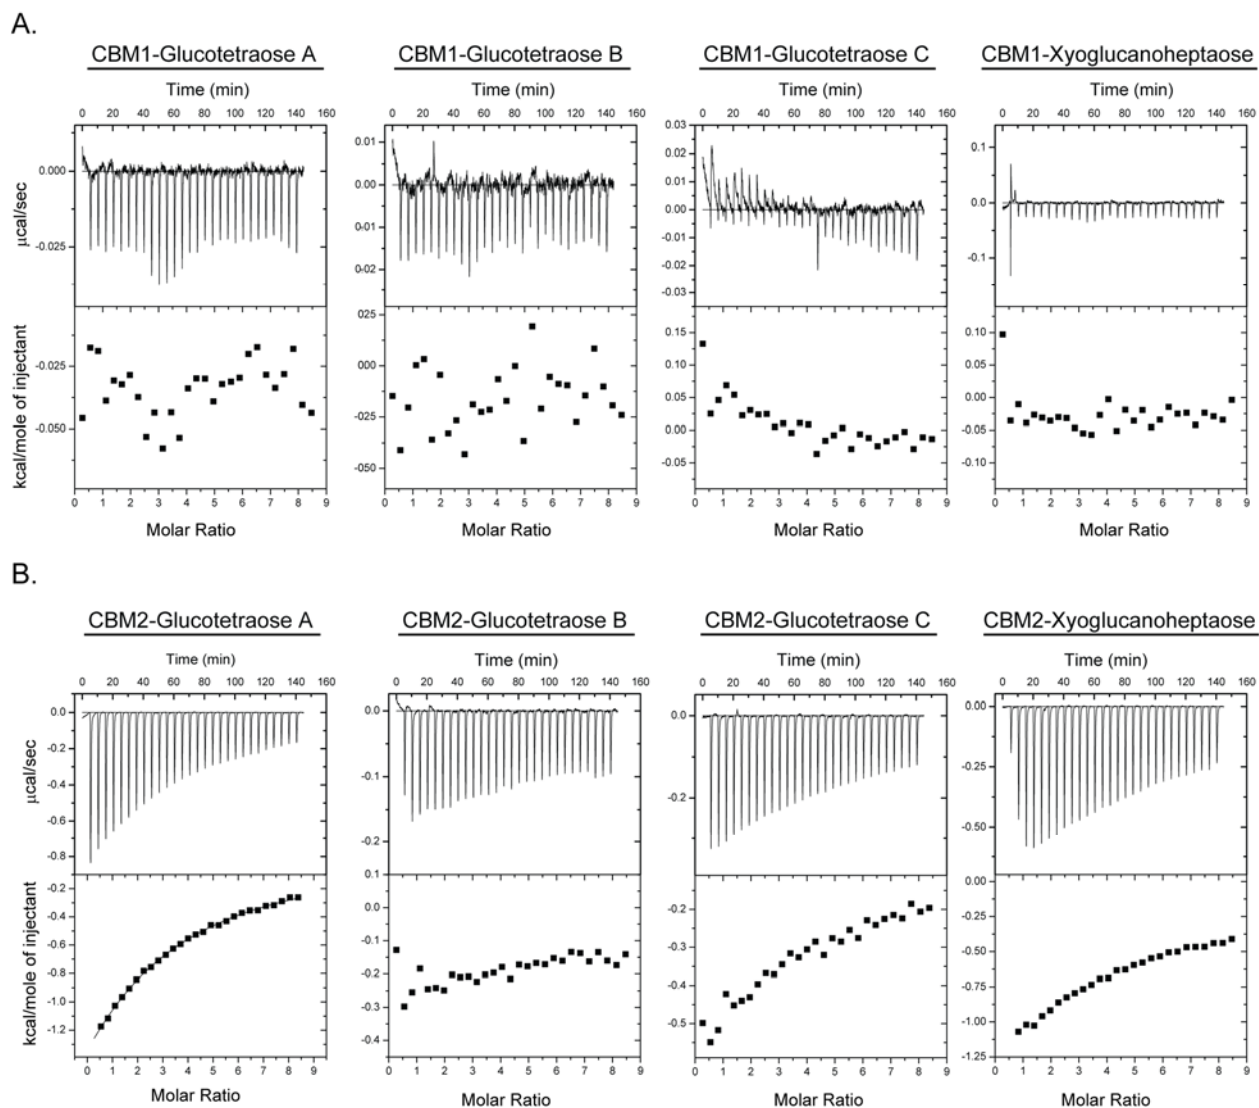

**Figure S4.** Representative ITC data for binding of (A) CBM1 and (B) CBM2 with lichenan and xyloglucan derived oligosaccharides as the ligand. Linkages within the ligands are as follows: Glucotetraose A, Glc $\beta$ 1-3Glc $\beta$ 1-4Glc $\beta$ 1-4Glc; Glucotetraose B, Glc $\beta$ 1-4Glc $\beta$ 1-4Glc $\beta$ 1-3Glc, Glucotetraose C, Glc $\beta$ 1-4Glc $\beta$ 1-3Glc $\beta$ 1-4Glc; Xyloglucanoheptaose, X<sub>3</sub>Glc<sub>4</sub>. All experiments were carried out in 50 mM sodium phosphate buffer, pH 7.0 at 25 °C.

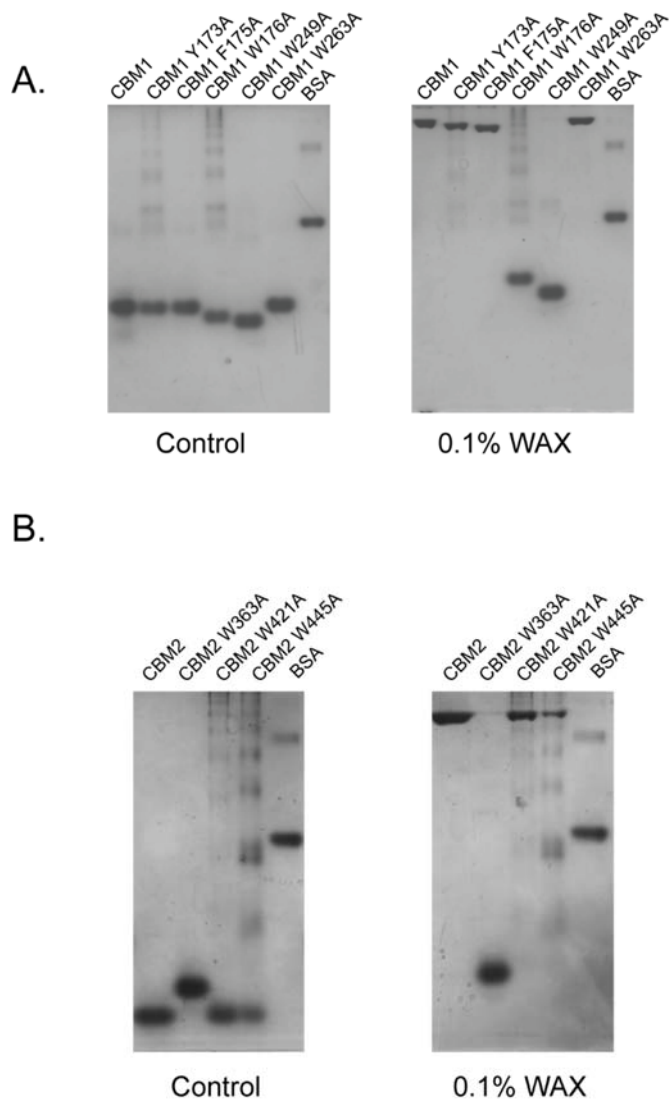

**Figure S5.** Affinity gel electrophoresis. Native polyacrylamide gels were prepared with or without 0.1% w/v wheat arabinoxylan (WAX). Two  $\mu\text{g}$  of each protein or 1  $\mu\text{g}$  of bovine serum albumin (BSA) was loaded and electrophoresed at 100 V for 6 h at 4  $^{\circ}\text{C}$ . (A) CBM1 and its mutants. (B) CBM2 and its mutants.

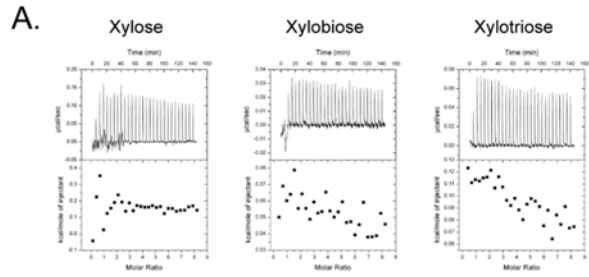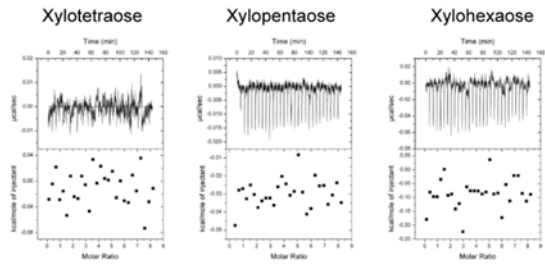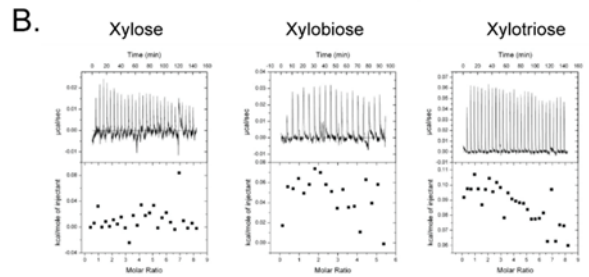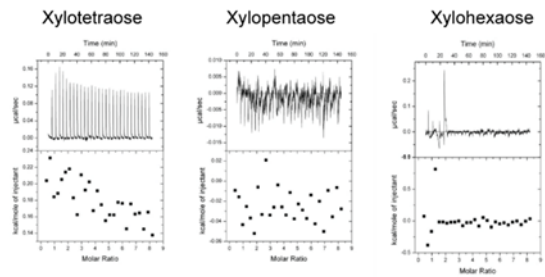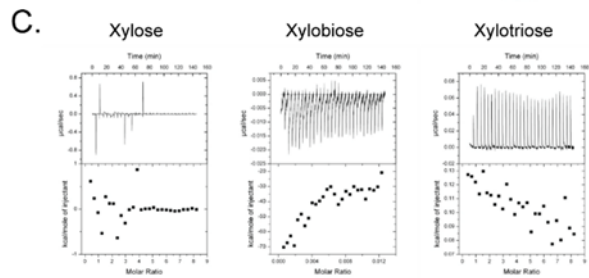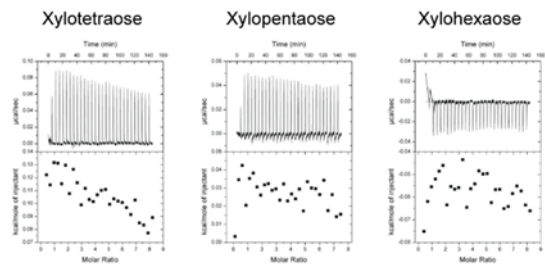

**Figure S6.** Representative ITC data for binding of (A) CBM1 W176A, (B) CBM1 W249A and (C) CBM2 W363A, with xylo-oligosaccharides as the ligand. All experiments were carried out in 50 mM sodium phosphate buffer, pH 7.0 at 25 °C.

A.

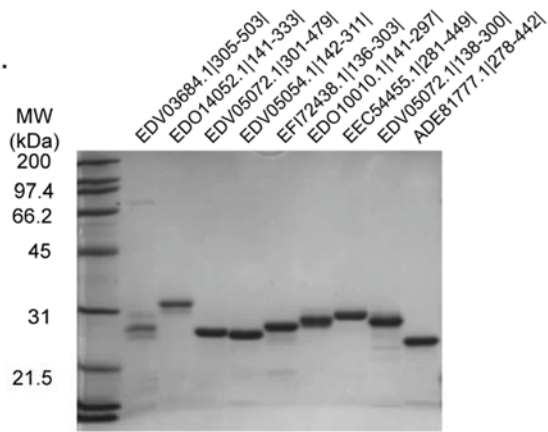

B.

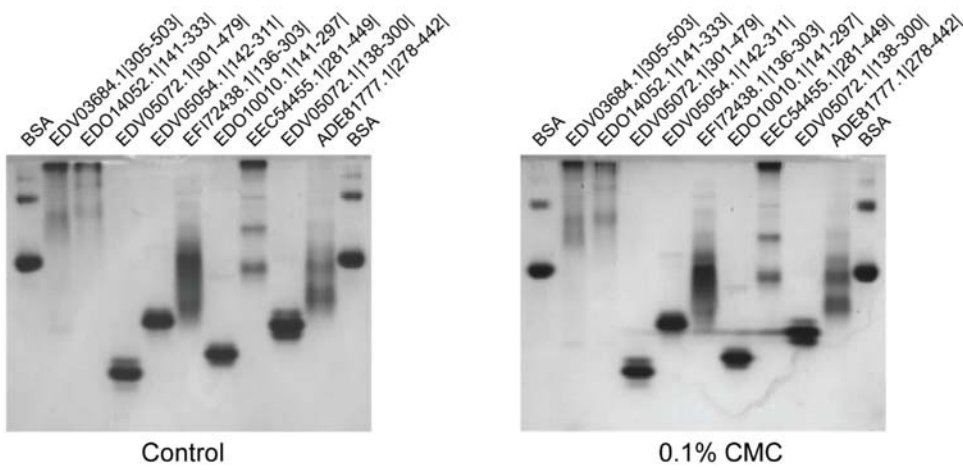

C.

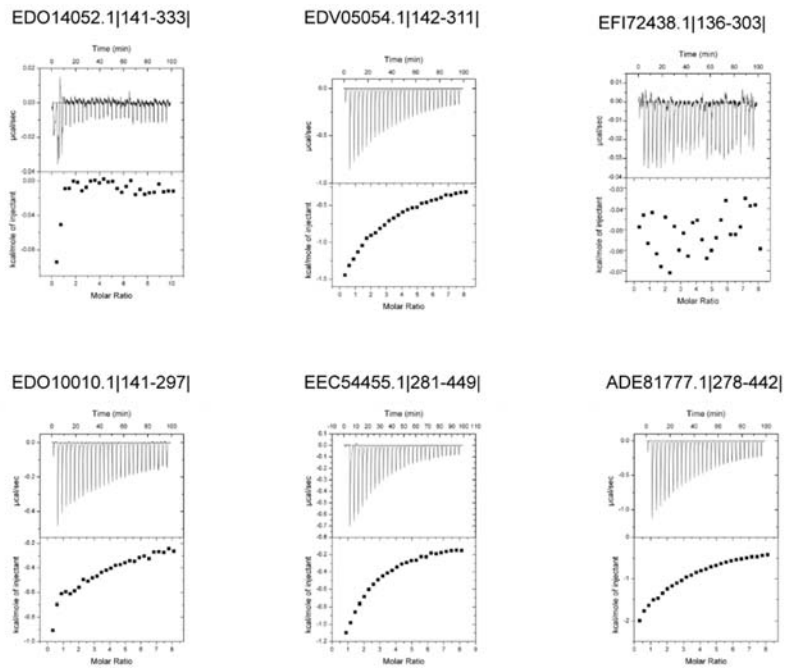



**Figure S7.** The detection of binding activity of selected proteins with CMC and xylo-oligosaccharides. (A) SDS-PAGE showing the purified proteins. The proteins were purified as described in materials and methods. Two  $\mu\text{g}$  of protein was loaded on the 12% w/v polyacrylamide gel and stained with Coomassie brilliant blue G-250. (B) Affinity gel electrophoresis. Native polyacrylamide gels were prepared with or without 0.1% w/v carboxymethyl cellulose (CMC). Two  $\mu\text{g}$  of each protein or 1  $\mu\text{g}$  of bovine serum albumin (BSA) was loaded and electrophoresed at 100 V for 6 h at 4 °C. (C) ITC data for binding activity of selected proteins with xylopentaose as the ligand. All experiments were carried out in 50 mM sodium phosphate buffer, pH 7.0 at 25 °C.

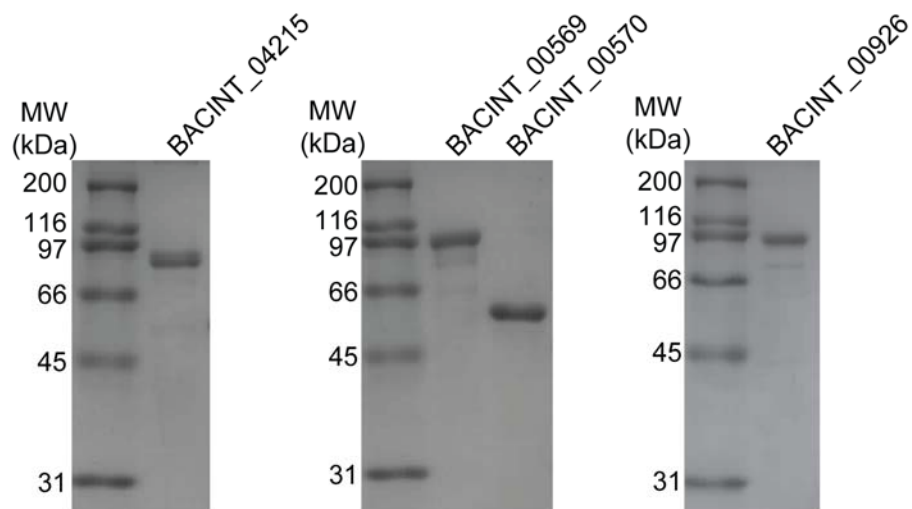

**Figure S8.** SDS-PAGE analysis of the purified recombinant proteins BACINT\_04215 (BiXyn10A), BACINT\_00569, BACINT\_00570, and BACINT\_00926 (BiXyl3A). Two  $\mu\text{g}$  of each of the proteins was resolved on a 12% w/v SDS-polyacrylamide gel and stained with Coomassie brilliant blue G-250.

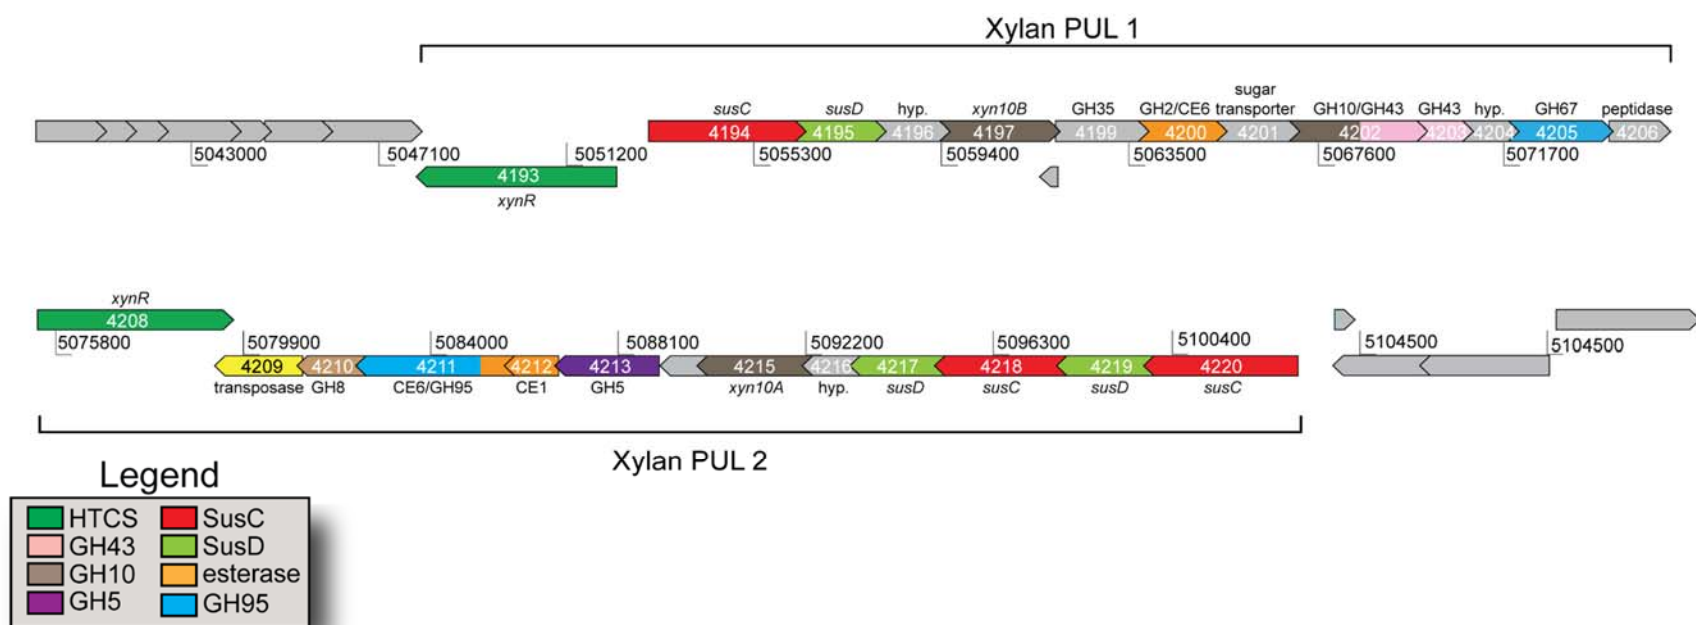

**Figure S9.** Genomic organization of the major xylan utilization locus in *Bacteroides intestinalis* DSM 17393. ORF numbers indicated within each of the genes correspond to those listed in the GenBank database. Numbering indicates the nucleotide position along the genome. Annotations were made using a hybrid approach with dbCAN, RAST, and Pfam as described in the text.

```

1      10      20      30      40      50      60      70      80      90      100
BACINT_4202 MKLKYLA LSVCAATF MSCNSDKPVAADPTLKDILGNKFLVGVAINSEQAVGRDTS GVDVRRHFNSIVAENCMKSEVIHP EEDRYDFSLADEFVKFGEDN
CCY87565.1  MKLKYLA LSVCAATF MSCNSDKPVAADPTLKDILGNKFLVGVAINSEQAVGRDTS GVDVRRHFNSIVAENCMKSEVIHP EEDRYDFSLADEFVKFGEDN

      110      120      130      140      150      160      170      180      190      200
BACINT_4202 GMFIIGHCLVWHSQ LSPWFCVDADGKNVSP EVLKERLRSHIHTIVGRYKGRIK GWDVVNEAIEGDGSYR RSKFYEILGEEYIPLAFQY AHEADPEAELYY
CCY87565.1  GMFIIGHCLVWHSQ LSPWFCVDADGKNVSP EVLKERLRSHIHTIVGRYKGRIK GWDVVNEAIEGDGSYR RSKFYEILGEEYIPLAFQY AHEADPEAELYY

      210      220      230      240      250      260      270      280      290      300
BACINT_4202 NDYGMHEPGRRD A VVRMVNSLKEKGLRIDAVGM QGHMGLDYP SIGEYETSIFAF AFASTGAKVMI TEWDSALP TVNRGANIADK VAF EKALNPY PEALPDS
CCY87565.1  NDYGMHEPGRRD A VVRMVNSLKEKGLRIDAVGM QGHMGLDYP SIGEYETSIFAF AFASTGAKVMI TEWDSALP TVNRGANIADK VAF EKALNPY PEALPDS

      310      320      330      340      350      360      370      380      390      400
BACINT_4202 VSNLWNARMKSF M E LFIKHSDVITRVTAWGVSDGDSWKNDW PVPGRREYPLLFDRNY QPKPFLKEILEE R VAKF YEF SYSDNSQLT IDNSMQRDS AANC
CCY87565.1  VSNLWNARMKSF M E LFIKHSDVITRVTAWGVSDGDSWKNDW PVPGRREYPLLFDRNY QPKPFLKEILEE R VAKF YEF SYSDNSQLT IDNSMQRDS AANC
                                                                KAPVDFEFYTVAP.....KDTDKA

      410      420      430      440      450      460      470      480      490      500
BACINT_4202 QLS TVN CQLQ NPILPGCYPDPSICRVGNDY YMVNSSFAFY PGVPIWHSTN LTNWEQLGYV LNRPSQLP MYDGLRISGGIY APDIKYNPHNGLFY LITTA V
CCY87565.1  TDQLT TPGTL NPVLPGCYPDPSICRVGNDY YMVNSSFAFY PGVPIWHSTD LTNWEQLGYV LNRPSQLP MYDGLRISGGIY APDIKYNPHNGLFY LITTA V

      510      520      530      540      550      560      570      580      590      600
BACINT_4202 DGGGNFFVTTDD PPKGSWSDPTFLPEVGGIDP GFLFDE DGKAYIVNNDGPAGKPEYDGHRAIWIREFDWKNGCTV GKQKMIVDGGVDKTRHPIWIEGPHL
CCY87565.1  DGGGNFFVTTDD PPKGSWSDPTFLPEVGGIDP GFLFDE DGKAYIVNNDGPAGKPEYDGHRAIWIREFDWKNGCTV GKQKMIVDGGVDKTRHPIWIEGPHL

      610      620      630      640      650      660      670      680      690      700
BACINT_4202 YHINGTYYLMAA EGGTGP NHSEVIFTSASPFGPFKPCAINPIL TQRGLPGDRPNPVT CVGHADLVETPAGDWYAVFLGVRPYRDGHDVMGRET FMLPVTW
CCY87565.1  YHINGTYYLMAA EGGTGP NHSEVIFTSASPFGPFKPCAINPIL TQRGLPGDRPNPVT CVGHADLVETPAGDWYAVFLGVRPYRDGHDVMGRET FMLPVTW

      710      720      730      740      750      760      770      780      790      800
BACINT_4202 KENQPIILPEGDV IYTYTADRSYGPAPLWTANGLAKEAFFIR TPLVPCYSINDKGQLEMTASSTDLNQKRQPA AIGRWINNWTFTAQTGLDFV PQQPKDFA
CCY87565.1  KENQPIILPEGDV IYTYTADRSYGPAPLWTANGLAKEAFFIR TPLVPCYSINDKGQLEMTASSTDLNQKRQPA AIGRWINNWTFTAQTGLDFV PQQPKDFA

      810      820      830      840      850      860      870      880      890      900
BACINT_4202 GIICFHDDNCYI RFGKTLDKDGKPVMLLETYS HGR LCSQAGSPLTWT DGKVYLKVEGDNAVNYTFCYSTSPKGSWTQV GEPVSADLISTQTAGGFTGTMV
CCY87565.1  GIICFHDDNCYI RFGKTLDKDGKPVMLLETYS HGR LCSQAGSPLTWT DGKVYLKVEGDNAVNYTFCYSTSPKGSWTQV GEPVSADLISTQTAGGFTGTMV

      910
BACINT_4202 GIYATGNYTN
CCY87565.1  GIYATGNYTN

```

**Figure S10.** Amino acid sequence alignment of BACINT\_04202 and the most similar protein (CCY87565.1) from *B. intestinalis* CAG:564. The amino acid sequences were obtained from GenBank, aligned with ClustalW, and then visualized using ESript 3.0.

Inverted Repeat 1

```
385          390          395          400          405
|           |           |           |           |
Q L T I D N S M Q R D S A A N C Q L S T V N C Q L
CAATTGACAATTGACAATTCTATGCAGCGTGACAGCGCAGCCAATTGTCAATTGTCAACTGTCAATTGTCAATTG
|           |           |           |           |           |
1160        1170        1180        1190        1200        1210        1220
```

Inverted Repeat 2

```
385          390          395          400          405
|           |           |           |           |
Q L T I D N S M Q R D S A A N C Q L S T V N C Q L
CAATTGACAATTGACAATTCTATGCAGCGTGACAGCGCAGCCAATTGTCAATTGTCAACTGTCAATTGTCAATTG
|           |           |           |           |           |
1160        1170        1180        1190        1200        1210        1220
```

**Figure S11.** Analysis of the inverted repeats in BACINT\_04202. The nucleotide sequence for BACINT\_04202 was analyzed for inverted and direct repeats using UGENE (1). Two pairs of inverted repeats with 23 (IR1) and 43 (IR2) nucleotide spacers were identified with partial overlap at the 5' end. Shaded regions represent the inverted repeats. Top numbers indicate amino acid position and the bottom numbers indicate nucleotide positions.

1. Okonechnikov K, Golosova O, & Fursov M (2012) Unipro UGENE: a unified bioinformatics toolkit. *Bioinformatics* 28(8):1166-1167.
